# Supplementary material for: Sea ice transport and replenishment across and within the Canadian Arctic Archipelago, 2016–2022
Source: Copernicus journal article supplement (doi:10.5194/tc-18-2321-2024), 2024-05-07
Supplement: Supplementary file 1 [file tc-18-2321-2024-supplement.zip]

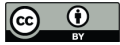

*Supplement of*

**Sea ice transport and replenishment across and within the Canadian Arctic Archipelago, 2016–2022**

**Stephen E. L. Howell et al.**

*Correspondence to:* Stephen E. L. Howell ([stephen.howell@ec.gc.ca](mailto:stephen.howell@ec.gc.ca))

- [tc-18-2321-2024-supplement-title-page.pdf](#)
- [TC\\_FluxData.xlsx](#)

The copyright of individual parts of the supplement might differ from the article licence.
